# Supplementary material
Source: Elsevier journal article supplement (https://www.sciencedirect.com/science/article/pii/S0300289622006615)
Supplement: mmc1 [file S0300289622006615:mmc1.doc]

|  |  | | | | | | | | | | | |
| --- | --- | --- | --- | --- | --- | --- | --- | --- | --- | --- | --- | --- |
|  | **CURRENT SMOKER** | | | | **FORMER SMOKER** | | | | **NEVER SMOKER** | | | |
|  | **1997** | **2007** | **2017** | ***P*-value** | **1997** | **2007** | **2017** | ***P*-value** | **1997** | **2007** | **2017** | ***P*-valor** |
| Andalucía, n (%) | 197 (33.7) | 233 (33.3) | 117 (26.0) | 0.013 | 147 (25.1) | 218 (31.1) | 176 (39.1) | <0.001 | 241 (41.2) | 249 (35.6) | 157 (34.9) | 0.055 |
| Asturias, n (%) | 153 (25.0) | 31 (28.2) | 102 (23.5) | 0.585 | 154 (25.1) | 40 (36.4) | 145 (33.4) | 0.003 | 306 (49.9) | 39 (35.5) | 187 (43.1) | 0.006 |
| Castilla León, n (%) | 140 (22.8) | 85 (23.0) | 102 (21.7) | 0.878 | 148 (24.1) | 115 (31.1) | 170 (36.2) | <0.001 | 325 (53.0) | 167 (45.1) | 198 (42.1) | 0.001 |
| Catalonia, n (%) | 81 (15.9) | 136 (26.3) | 129 (28.4) | <0.001 | 120 (23.5) | 169 (32.6) | 163 (35.9) | <0.001 | 309 (60.6) | 213 (41.1) | 162 (35.7) | <0.001 |
| Madrid, n (%) | 125 (24.7) | 181 (30.2) | 130 (28.8) | 0.111 | 125 (24.7) | 205 (34.2) | 159 (35.2) | <0.001 | 257 (50.7) | 213 (35.6) | 163 (36.1) | <0.001 |

**Table 1:** Changes in smoking habit in 1997-2007 and 2017
